1 **Title:** Biosynthetic intermediates of the enterobacterial common antigen overcome outer  
2 membrane lipid dyshomeostasis in *Escherichia coli*

3

4 **Authors:** Xiang'Er Jiang<sup>a#</sup>, Rahul Shrivastava<sup>a#</sup>, Wee Boon Tan<sup>b#</sup>, Deborah Chwee San Seow<sup>c</sup>,  
5 Swaine Lin Chen<sup>d,e</sup>, Xue Li Guan<sup>c</sup>, Shu-Sin Chng<sup>a,b\*</sup>

6

7 **Affiliations:**

8 <sup>a</sup>Department of Chemistry, National University of Singapore, Singapore 117543.

9 <sup>b</sup>Singapore Center for Environmental Life Sciences Engineering, National University of  
10 Singapore (SCELSE-NUS), Singapore 117456.

11 <sup>c</sup>Lee Kong Chian School of Medicine, Nanyang Technological University, Singapore 636921.

12 <sup>d</sup>Yong Loo Lin School of Medicine, National University of Singapore, Singapore 119228.

13 <sup>e</sup>Genome Institute of Singapore, Agency for Science, Technology and Research (A\*STAR),  
14 Singapore 138672.

15

16 <sup>#</sup>These authors contributed equally to the work.

17 <sup>\*</sup>To whom correspondence should be addressed. E-mail: [chmchngs@nus.edu.sg](mailto:chmchngs@nus.edu.sg)

18

19 **Keywords:** Tol-Pal complex, ECA, outer membrane, lipid homeostasis, phospholipid transport,  
20 vancomycin resistance

21

22 **Abstract**

23

24 The outer membrane (OM) is an essential component of the Gram-negative bacterial cell  
25 envelope that protects cells against external threats such as antibiotics. To maintain a stable and  
26 functional OM barrier, cells require distinct mechanisms to ensure a balance of proteins and  
27 lipids in the membrane. Crucial to this is the proper transport and assembly of various OM  
28 components, of which the process of phospholipid (PL) transport is least understood. How OM  
29 assembly pathways are coordinated to achieve homeostasis is also unclear. In this study, we set  
30 out to identify potential mechanism(s) that can alleviate OM lipid dyshomeostasis in *Escherichia*  
31 *coli*. Cells lacking the Tol-Pal complex accumulate excess PLs in the OM due to defective  
32 retrograde PL transport. Here, we isolated mutations in enterobacterial common antigen (ECA)  
33 biosynthesis that restore OM barrier function in these strains; build-up of biosynthetic  
34 intermediates along the ECA pathway is key to this rescue. Interestingly, these ECA mutations  
35 re-establish OM lipid homeostasis in cells lacking the Tol-Pal complex yet do not act by  
36 restoring retrograde PL transport. Furthermore, a novel diacylglycerol pyrophosphoryl-linked  
37 ECA species structurally similar to PLs can be detected in the inner membrane of ECA mutants.  
38 We therefore propose a model where these unique species may modulate anterograde PL  
39 transport to overcome OM lipid dyshomeostasis. Our work provides insights into bacterial lipid  
40 transport across the cell envelope and highlights previously unappreciated effects of ECA  
41 intermediates in OM biology.

42

43 **Author Summary**

44

45 Biological membranes define cellular boundaries, allow compartmentalization, and represent a  
46 prerequisite for life; yet, our understanding of membrane biogenesis and stability remain  
47 rudimentary. In Gram-negative bacteria, the outer membrane prevents entry of toxic substances,  
48 conferring intrinsic resistance against many antibiotics. How the outer membrane is assembled,  
49 specifically lipid trafficking processes are not well understood. How this membrane is stably  
50 maintained is also unclear. In this study, we discovered that intermediates along the biosynthetic  
51 pathway of an exopolysaccharide exhibit stabilizing effects on outer membranes with lipid  
52 imbalance in *Escherichia coli*. Our work suggests that these intermediates modulate phospholipid  
53 trafficking within the double-membrane cell envelope to achieve outer membrane lipid  
54 homeostasis. Furthermore, it provides a starting point to begin identifying hitherto unknown  
55 phospholipid transport systems in Gram-negative bacteria, which are potential targets for the  
56 development of future antibiotics.

## 57 **Introduction**

58

59 Gram-negative bacteria are surrounded by a multilayered cell envelope consisting of the  
60 inner membrane (IM), the peptidoglycan layer, and the outer membrane (OM). This envelope  
61 structure, in particular the OM, plays an essential role in preventing toxic molecules from  
62 entering the cell, contributing to intrinsic resistance of Gram-negative bacteria against many  
63 antibiotics and detergents [1]. The OM bilayer is asymmetric and has a unique lipid composition,  
64 comprising lipopolysaccharides (LPS) in the outer leaflet and phospholipids (PLs) in the inner  
65 leaflet. In the presence of divalent cations, LPS molecules in the outer leaflet pack together to  
66 form an impervious monolayer [2]; OM structure and lipid asymmetry are thus key determinants  
67 for its barrier function. Furthermore, the OM is essential for growth, highlighting the importance  
68 of understanding how it is established and maintained.

69 The biogenesis of the OM has been relatively well studied. Key components, including LPS,  
70 integral  $\beta$ -barrel proteins, and lipoproteins, are transported and assembled unidirectionally into  
71 the OM by the Lpt [3], Bam [4], and Lol machinery [5], respectively. Trafficking of bulk PLs  
72 between the IM and the OM is less well characterized, although it is known to proceed in both  
73 directions [6-8]. To build a stable and functional OM, the synthesis, transport, and assembly of  
74 these different components need to be coordinated. Regulatory cascades, including the  $\sigma^E$ , Cpx  
75 and Rcs signaling pathways, sense and control the levels of different OM components, especially  
76 in the context of envelope stress [9-11]. Another mode of coordination involves interdependency  
77 among the various OM assembly systems; notably, the presence of a  $\beta$ -barrel protein (LptD) and

78 a lipoprotein (LptE) in the OM LPS translocon implies that LPS transport requires functional  
79 Bam and Lol pathways. A third mechanism, which is related to OM homeostasis, suggests that  
80 the cell maintains a high flux of PLs to the OM to offset problems created by changes in levels of  
81 other OM components [12]. Here, excess PLs can be transported back to the IM in a manner  
82 dependent on the Tol-Pal complex.

83 The Tol-Pal complex is a conserved multi-protein system that forms an energy dependent  
84 trans-envelope bridge across the cell envelope in Gram-negative bacteria [13-15]. It comprises  
85 two sub-complexes: TolQRA in the IM and TolB-Pal at the OM. The function of the Tol-Pal  
86 complex has been elusive, although it is known to be generally important for OM stability and  
87 integrity [13]. Recently, we demonstrated that the Tol-Pal complex is involved in the  
88 maintenance of OM lipid homeostasis in *Escherichia coli* [12]. Cells lacking the intact complex  
89 accumulate excess PLs in the OM due to defects in retrograde (OM-to-IM) PL transport. This  
90 increase in PL content in the OM contributes to many known phenotypes in *tol-pal* mutants,  
91 including hypersensitivity to antibiotics and detergents, leakage of periplasmic content, and OM  
92 hypervesiculation [13, 16]. The Tol-Pal complex is also involved in OM invagination during cell  
93 division [17]. Overall, it is believed that the Tol-Pal complex mediates retrograde transport of  
94 bulk PLs to maintain homeostasis and stability at the OM.

95 OM biogenesis and maintenance are complex processes, so there are likely other  
96 mechanisms involved in controlling the levels of OM components. To gain more insight into OM  
97 homeostasis, we asked whether cells lacking the Tol-Pal complex could restore their OM barrier  
98 function by compensatory mutations in other pathways. We found that disruption in the

99 biosynthesis of enterobacterial common antigen (ECA), a cell surface polysaccharide in the  
100 Enterobacteriaceae family [18], rescues OM permeability defects in *tol-pal* mutants. The  
101 accumulation of ECA intermediates is responsible for this rescue. Interestingly, we demonstrate  
102 that OM lipid homeostasis is restored even though retrograde PL transport is still defective. Our  
103 work suggests a model where cells overcome the problem of excess PL accumulation in the OM  
104 by inhibiting anterograde PL transport.

105

## 106 **Results**

107

### 108 **Loss-of-function mutations in ECA biosynthesis rescue OM permeability defects in *tol-pal*** 109 **mutants**

110

111 Cells lacking the Tol-Pal complex have compromised OM integrity due to the accumulation of  
112 excess PLs [12]. To identify other pathways important for maintaining OM lipid homeostasis, we  
113 sought to isolate genetic suppressor mutations that could restore OM barrier function in a  
114  $\Delta$ *tol-pal* mutant. We selected for suppressors that rescue sensitivity to vancomycin, the large cell  
115 wall-targeting antibiotic that cannot penetrate an intact and functional OM [19]. Cells have no  
116 intrinsic mechanism to alter cell wall structure to give rise to resistance against vancomycin;  
117 consistently, suppressor colonies appeared at a low frequency of  $\sim 1 \times 10^{-9}$ . We obtained 36  
118 individual suppressor strains, all of which exhibited stable resistance phenotypes against  
119 vancomycin similar to a wild-type (WT) strain. We further examined the susceptibilities of these

120 strains against other commonly used antibiotics, including rifampicin and erythromycin. An  
121 intact OM also impedes the entry of rifampicin and erythromycin but less effectively than against  
122 vancomycin [19]. Based on the observed phenotypes, these suppressors can be broadly  
123 categorized into four classes. Class I suppressors exhibit near wild-type level resistance against  
124 all antibiotics tested (S1A Fig). Class II and III suppressors are fully resistant to vancomycin and  
125 one other antibiotic, while Class IV strains are only resistant to vancomycin. Class I suppressor  
126 strains appear to have restored OM barrier function. Consistent with this, many of these strains  
127 do not leak, or release less, periplasmic RNase I into the media during growth when compared to  
128 the parent  $\Delta tol-pal$  mutant (S1B Fig). We sequenced the genomes of the parent strain and all  
129 eight Class I suppressors. Each suppressor strain contains multiple mutations relative to the  
130 parent  $\Delta tol-pal$  mutant (S1 Table); interestingly, all of these strains have mutations in genes  
131 involved in the biosynthesis of ECA (*wecB*, *wecC*, or *wecF*).

132 Six strains contain mutations in *wecC*, which encodes a dehydrogenase enzyme in the ECA  
133 synthesis pathway [18, 20]. A 6-bp in-frame insertion in *wecC*, termed *wecC\**, is common to four  
134 of these strains, suggesting that this allele may be important for restoring OM barrier function in  
135 the  $\Delta tol-pal$  mutant. To validate this, we re-constructed the *wecC\** mutation in the native locus  
136 using a negative selection technique [21], and confirmed that this allele alone is able to rescue  
137 vancomycin sensitivity (Fig 1A) and periplasmic leakiness in  $\Delta tolQ$ ,  $\Delta tolA$ , and  $\Delta tolB$  strains  
138 (S2A Fig). The effects of *wecC\** on these phenotypes are only partial, however, suggesting that  
139 other mutations found in the original suppressor strains may also contribute to restoring OM  
140 function. Supporting this idea, the *wecC\** mutation does not restore resistance of the *tol-pal*

141 strains against erythromycin and rifampicin (S2B Fig). Rifampicin (MW ~823) and erythromycin  
142 (MW ~734) are much smaller than vancomycin (MW ~1449). It appears that the *wecC\** mutation  
143 only restores OM barrier function in the *tol-pal* mutant against the passage of larger molecules,  
144 including vancomycin and periplasmic proteins (e.g. RNase I).

145 The *wecC\** mutation results in the insertion of two amino acids (Pro and Gly) five residues  
146 away from the predicted active site Cys in the full-length protein, suggesting that WecC function  
147 may be disrupted. Consistent with this, we did not detect any ECA in strains containing this  
148 *wecC\** allele (Fig 1C). Furthermore, we showed that deletion of *wecC* also partially restores  
149 vancomycin resistance in *tol-pal* strains (Fig 1B and C). We isolated *wecB* and *wecF* mutations  
150 in two of the Class I suppressor strains (Table S1); we therefore constructed  $\Delta wecB$  and  $\Delta wecF$   
151 mutants to test their rescue phenotypes. Both null mutations partially rescue vancomycin  
152 sensitivity in the  $\Delta tolA$  strain (Fig 1D). We conclude that loss-of-function mutations in ECA  
153 biosynthesis restore the function of the OM in strains lacking the Tol-Pal complex.

154

155 **Suppression of OM permeability defects in *tol-pal* strains by mutations in ECA biosynthesis**  
156 **is independent of Rcs phosphorelay pathway and/or capsular polysaccharide biosynthesis**

157

158 Mutations in the ECA pathway are known to trigger the Rcs phosphorelay stress response [22].  
159 *tol-pal* mutations also strongly activate the Rcs signaling cascade [23]. Consequently, combined  
160 *tol-pal*/ECA mutant colonies exhibit strongly mucoid phenotypes, presumably due to the  
161 over-production of capsular polysaccharides (colanic acids), which is regulated by the Rcs



162 pathway [24, 25]. We therefore considered whether hyperactivation of the Rcs stress response or  
163 up-regulation of colanic acid biosynthesis contributed to the suppression of vancomycin  
164 sensitivity by ECA mutations in the *tol-pal* strains. To test this idea, we examined vancomycin  
165 sensitivity in *rscC* (encoding the histidine sensor kinase of the Rcs pathway) [24] or *wcaJ*  
166 (encoding the glycosyl transferase that initiates colanic acid biosynthesis) [26] mutants. Deleting  
167 *rscC* or *wcaJ* did not prevent the  $\Delta wecC$  mutation from suppressing vancomycin sensitivity in  
168 the  $\Delta tolA$  strain; instead, the  $\Delta rcsC \Delta tolA \Delta wecC$  and  $\Delta wcaJ \Delta tolA \Delta wecC$  mutants display full  
169 resistance against vancomycin, similar to WT cells (Fig 2A). Furthermore, the  $\Delta wecC$  mutation  
170 still partially rescued periplasmic leakiness in  $\Delta rcsC$  and  $\Delta wcaJ$  background strains (Fig 2B).  
171 The mechanism by which the  $\Delta wecC$  mutation suppresses *tol-pal* phenotypes is therefore  
172 independent of the Rcs phosphorelay.

173 We have observed that the  $\Delta wecC$  mutation rescues vancomycin sensitivity in the  $\Delta tolA$   
174 strain; however, we noted that different transductants display varying extents of suppression (S3  
175 Fig). We found that removing RcsC or WcaJ greatly improved the consistency of suppression of  
176 the  $\Delta tolA$  phenotype by the  $\Delta wecC$  mutation. This suggests that the initial variability in  
177 suppression could be due to varying mucoidal phenotypes. To eliminate this inconsistency, we  
178 used strains deleted of *wcaJ* for the rest of this study.

179

180 **Accumulation of ECA intermediates along the biosynthetic pathway is necessary for rescue**  
181 **of *tol-pal* phenotypes**

182

183 The initial steps of ECA biosynthesis involve successive addition of three sugar moieties  
184 (*N*-acetyl-D-glucosamine (GlcNAc), *N*-acetyl-D-mannosaminuronic acid (ManNAcA), and  
185 4-acetamido-4,6-dideoxy-D-galactose (Fuc4NAc)) to the undecaprenyl phosphate (und-P) lipid  
186 carrier to form Lipid III<sup>ECA</sup> [18, 27]. After its synthesis at the inner leaflet of the IM, Lipid III<sup>ECA</sup>  
187 is flipped across the membrane by WzxE [28]. This trisaccharide repeating unit is then  
188 polymerized by WzyE to form the complete ECA polymer, whose polysaccharide chain length is  
189 regulated by WzzE [29, 30]. The whole ECA polymer, which is now carried on undecaprenyl  
190 pyrophosphate (und-PP), is finally transferred to form a phosphatidyl-linked species (ECA<sub>PG</sub>)  
191 before being transported to the OM [31-33] (Fig 3A). The enzymes mediating the last two steps  
192 are not known. Of note, a small amount of ECA polymer may be found attached to LPS (ECA<sub>LPS</sub>)  
193 or exists in a soluble cyclic form (ECA<sub>CYC</sub>) in the periplasm [18].

194 We have shown that loss-of-function mutations in *wecB*, *wecC*, and *wecF* rescue  
195 vancomycin sensitivity in *tol-pal* mutants (Fig 1). These mutations result in both loss of ECA  
196 itself and the build-up of Lipid I<sup>ECA</sup> or Lipid II<sup>ECA</sup> intermediates along the biosynthetic pathway  
197 (Fig 3A). To test whether ECA loss is important, we mutated *wecA*, which encodes the enzyme  
198 that catalyzes the first committed step in ECA biosynthesis [34]. Interestingly, we found that the  
199  $\Delta tolA \Delta wecA$  mutant (in the  $\Delta wcaJ$  background) is equally sensitive to vancomycin as the  $\Delta tolA$   
200 mutant (Fig 3B), suggesting that accumulation of intermediates along the ECA pathway, but not  
201 loss of ECA, is responsible for the suppression. Consistent with this idea, removing other ECA  
202 biosynthetic enzymes that result in accumulation of intermediates (Lipid I<sup>ECA</sup> in  $\Delta wecG$ , or Lipid  
203 II<sup>ECA</sup> in  $\Delta wecE$ ) fully rescues vancomycin sensitivity in the  $\Delta tolA$  mutant (Fig 3B). Importantly,

204 rescue of vancomycin sensitivity in these strains is completely abolished when *wecA* is also  
205 deleted (Fig 3C). We conclude that the build-up of Lipid I<sup>ECA</sup> or Lipid II<sup>ECA</sup> intermediates can  
206 somehow restore OM barrier function in the absence of the Tol-Pal complex.

207         We next tried to test whether mutations in later steps of ECA biosynthesis also suppress  
208 *tol-pal* phenotypes. However, it has been reported that blocking translocation across the IM or  
209 subsequent polymerization of Lipid III<sup>ECA</sup> causes toxicity in cells. Removing WzxE, together  
210 with WzxB, the O-antigen flippase that can also transport Lipid III<sup>ECA</sup>, is lethal [28] (S4A Fig).  
211 WzyE is also essential for growth [29, 35] (S4B Fig), precluding further analysis. We therefore  
212 turned our attention to WzzE. Remarkably, deletion of *wzzE* partially rescues vancomycin  
213 sensitivity in the  $\Delta tolA$  mutant, and this phenotype is dependent on the presence of WecA (Fig  
214 4A). Cells lacking WzzE are known to lose modality in the ECA polymer, giving rise to a more  
215 random distribution of chain lengths [30]. We validated this observation; there are relatively  
216 higher levels of shorter chain ECA, including Lipid III<sup>ECA</sup> precursors, in the  $\Delta wzzE$  mutant (Fig  
217 4B). Taken together, our results suggest that build-up of Lipid III<sup>ECA</sup> intermediates can also  
218 rescue OM defects in cells lacking the Tol-Pal complex.

219         Recently, it has been reported that the build-up of ECA “dead-end” intermediates in a strain  
220 with defective undecaprenyl pyrophosphate synthase (UppS) [36] can lead to sequestration of  
221 und-P, the common precursor for many sugar polymers in the cell envelope including  
222 peptidoglycan; this gives rise to severe shape defects such as filamentation and swelling [37].  
223 Contrary to this finding, in our strains that express wild-type UppS, we did not observe major  
224 shape defects in the  $\Delta wecC$  mutant, whether in the WT or  $\Delta tolA$  background (S5A Fig). However,

225 our double *tol-pal wec* mutants often exhibit a small colony morphology. We further showed that  
226 overexpression of UppS, which can alleviate potential und-P sequestration [37], did not reverse  
227 the suppression effect of ECA mutations on vancomycin sensitivity in the  $\Delta tolA$  mutant (S5B  
228 Fig). These results indicate that the effect of accumulation of ECA intermediates in restoring  
229 vancomycin resistance in *tol-pal* mutants is independent of und-P sequestration.

230 Accumulation of ECA intermediates, specifically Lipid II<sup>ECA</sup>, is also known to stimulate the  
231  $\sigma^E$  and Cpx stress response pathways [38]. However, we did not observe significant induction or  
232 increased stimulation of  $\sigma^E$  when Lipid I/II/III<sup>ECA</sup> intermediates were accumulated in WT or  
233  $\Delta tolA$  strains, respectively (S6A Fig). Removing the Cpx pathway also did not affect vancomycin  
234 resistance in the  $\Delta tolA \Delta wzzE$  strain (S6B Fig). We conclude that both  $\sigma^E$  and Cpx stress  
235 responses are not involved in the ability of accumulated ECA intermediates to restore the OM  
236 barrier function in *tol-pal* mutants.

237

### 238 **Diacylglycerol pyrophosphoryl-linked species also accumulate in ECA biosynthesis mutants**

239

240 We have shown that accumulation of ECA intermediates rescues vancomycin sensitivity in  
241 strains lacking the Tol-Pal complex. However, und-PP-linked intermediates (Lipid I/II/III<sup>ECA</sup>)  
242 may not be the only species accumulated in ECA biosynthesis mutants. In a *Salmonella*  
243 Typhimurium  $\Delta rmlA$  mutant, which accumulates Lipid II<sup>ECA</sup>, a novel diacylglycerol  
244 pyrophosphoryl (DAG-PP)-linked species containing the first two sugars of ECA (GlcNAc and  
245 ManNAcA) was detected at comparable levels [39]. We therefore sought to determine whether

246 DAG-PP-linked adducts could also be found in our *E. coli* ECA mutants. Using high resolution  
247 mass spectrometry (MS), we analyzed lipids extracted from cells lacking WecG, which is  
248 expected to accumulate Lipid I<sup>ECA</sup>. We demonstrated that DAG-PP-GlcNAc species are indeed  
249 present in these cells, but not in WT (Fig 5A and 5B). Specifically, we detected peaks with m/z  
250 values corresponding to DAG-PP-GlcNAc species with various fatty acid compositions in the  
251 DAG moiety, namely 32:1 (m/z 928.4927), 34:1 (m/z 956.5243), 34:2 (m/z 954.5076), and 36:2  
252 (m/z 982.5391); these are in fact the major DAGs found in native PLs in *E. coli* [40]. Chemical  
253 structures of the 32:1 and 34:1 species were assigned and elucidated based on fragmentation  
254 patterns in MS/MS (Fig 6). Furthermore, we showed that the same species were specifically  
255 found in the IM but not the OM of the  $\Delta wecG$  mutant, as well as the  $\Delta wecC$  strain (Fig 5C). It is  
256 worth noting that DAG-PP has one extra phosphate moiety and is therefore structurally distinct  
257 from phosphatidic acid (i.e. diacylglycerol monophosphate or DAG-P), the final lipid carrier of  
258 ECA. How the DAG-PP-linked species are generated is not clear, but their existence highlights  
259 the need to consider possible effects of these novel lipids in ECA biosynthesis mutants,  
260 especially in the context of rescuing *tol-pal* phenotypes.

261

262 **Build up of ECA intermediates restores OM lipid homeostasis in *tol-pal* mutants but not**  
263 **defects in retrograde PL transport**

264

265 Cells lacking the Tol-Pal complex accumulate excess PLs (relative to LPS) in the OM due to  
266 defective retrograde PL transport [12]. Since mutations in the ECA biosynthetic pathway rescue

267 OM defects in *tol-pal* mutants (Fig 1), we hypothesized that OM lipid homeostasis is restored in  
268 these strains. To test this idea, we examined steady state OM lipid compositions in  $\Delta tolA \Delta wecC$   
269 mutant cells by measuring the distribution of [ $^3\text{H}$ ]-glycerol-labelled PLs between the IM and the  
270 OM, and also determining the ratio of PLs to LPS (both labelled with [ $^{14}\text{C}$ ]-acetate) in the OM.  
271 Consistent with our previous findings, the  $\Delta tolA$  mutant contained more PLs in the OM than WT  
272 cells (here in the  $\Delta wcaJ$  background). Specifically, cells lacking TolA accumulate  $\sim 1.6$ -fold  
273 excess PLs in the OM (relative to the IM), as judged by [ $^3\text{H}$ ] distribution (Fig 7A). Furthermore,  
274 these cells have a  $\sim 1.5$ -fold higher [ $^{14}\text{C}$ ]-PL/LPS ratio in the OM (Fig 7B and S7 Fig). The  $\Delta wecC$   
275 mutation alone did not alter PL profiles in the OM. Remarkably, however, deleting *wecC* in the  
276  $\Delta tolA$  strain not only re-established intermembrane PL distribution, but also returned the OM  
277 PL/LPS ratio back to wild-type (Fig 7A and 7B). Notably, the  $\Delta wecC$  mutation had no impact on  
278 LPS levels (S8 Fig). In toto, we conclude that build-up of intermediates as a result of defective  
279 ECA biosynthesis restores OM lipid homeostasis in cells lacking the Tol-Pal complex.

280 Cells lacking the Tol-Pal complex produce more OMVs [16]. We have previously shown that  
281 these OMVs contain an elevated PL/LPS ratio, similar to that in the OM of these cells [12], and  
282 suggested that *tol-pal* mutants hypervesiculate because of increased PL content in the OM. Given  
283 that the  $\Delta wecC$  mutation restores OM lipid homeostasis in the  $\Delta tolA$  strain, we asked whether  
284 OMV production in these double mutants would be reduced to WT levels. Mutations in ECA  
285 biosynthesis are known to cause slight increases in OMV formation [41]; we confirmed that this is  
286 true for the  $\Delta wecC$  mutant (S9 Fig). Taking this into account, we observed essentially no change in  
287 the amount of OMVs produced by the  $\Delta tolA \Delta wecC$  strain compared to the  $\Delta tolA$  mutant.

288 Interestingly, OMVs derived from the double mutant have a PL/LPS ratio similar to that in its OM,  
289 which is essentially like WT (Fig 7B and S7 Fig). It therefore appears that lipid dyshomeostasis in  
290 the OM of *tol-pal* mutants only plays no more than a minor role in the hypervesiculation  
291 phenotype. OMV production, which mainly occurs at division sites and cell poles [16], may be due  
292 to inefficient OM invagination during cell division in the absence of the Tol-Pal complex [17].

293 How the accumulation of ECA intermediates restores lipid homeostasis in *tol-pal* mutants is  
294 not clear; one possible mechanism involves rescuing defects in retrograde PL transport in these  
295 strains. To test this idea, we monitored the turnover of [<sup>32</sup>P]-pulse-labelled OM anionic lipids in  
296 the  $\Delta tolA \Delta wecC$  mutant as these lipids are transported back to the IM [12]. Using this coupled  
297 assay, which we have previously developed, we established that cells lacking both TolA and WecC  
298 exhibit similar defects in retrograde PL transport when compared to the  $\Delta tolA$  mutant (S10 Fig).  
299 Hence, intermediates accumulated in ECA biosynthesis mutants do not act to increase transport of  
300 PLs from the OM back to the IM.

301

## 302 **Discussion**

303

304 In this study, we have employed a genetic approach to gain insights into OM homeostasis in *E.*  
305 *coli*. We have identified suppressor mutations that can rescue OM permeability defects in cells  
306 lacking the Tol-Pal complex, which are known to contain excess PLs in their OM [12, 42].  
307 Mutations in ECA biosynthesis restore OM lipid homeostasis (Fig 7), thus conferring vancomycin  
308 resistance and reduced periplasmic leakiness in *tol-pal* strains (Figs 1 and 2). We have further

309 demonstrated that these rescue phenotypes are due to the accumulation of intermediate species  
310 along the ECA pathway (Figs 3 and 4). We propose that these species, which are likely in the IM,  
311 affect OM lipid biology by modulating PL transport across the cell envelope.

312 The role of ECA in the enterobacterial cell envelope is not known. Strains that do not make  
313 ECA are more sensitive to bile salts and produce more OMVs [38, 41]. Loss of cyclic ECA has  
314 also been reported to modulate OM function in strains lacking YhdP, a protein of unknown  
315 function [43]. These observations suggest that ECA has roles related to the OM. However, we have  
316 shown that loss of ECA itself ( $ECA_{PG}/ECA_{LPS}/ECA_{CYC}$ ) does not contribute to the restoration of  
317 OM barrier function in cells lacking the Tol-Pal complex; instead, the build-up of ECA  
318 biosynthetic intermediates is necessary for this rescue. Interestingly, accumulation of  
319 und-PP-linked intermediates (in the ECA, O-antigen, and colanic acid pathways) can lead to  
320 sequestration of und-P [44], the common lipid carrier also used for peptidoglycan precursors.  
321 While this can give rise to shape changes, it was not obvious in our strains (S5A Fig), which have  
322 functional UppS and do not synthesize O-antigens and colanic acids. Overexpression of UppS to  
323 increase the pool of available und-P also did not reverse the suppression of *tol-pal* phenotypes  
324 (S5B Fig). We therefore believe that restoration of OM phenotypes by ECA intermediates in cells  
325 lacking the Tol-Pal complex is independent of und-P sequestration. The rescue mechanism  
326 additionally does not appear to involve the major cell envelope stress response pathways (Fig 2  
327 and S6 Fig).

328 Cells lacking the Tol-Pal complex accumulate excess PLs in the OM due to defective  
329 retrograde PL transport [12]. We have shown that the accumulation of ECA intermediates restores



330 OM lipid homeostasis in *tol-pal* mutants (Fig 7), but how these intermediates act to correct the  
331 problem of excess PLs in the OM is not clear. We posit that the most direct mechanism(s) to  
332 prevent excess PL build-up at the OM would be to modulate PL transport across the cell envelope.  
333 Retrograde PL transport was not restored in the  $\Delta tolA \Delta wecC$  double mutant (S10 Fig); therefore,  
334 we further hypothesize that anterograde PL transport could in fact be attenuated. While  
335 und-PP-linked intermediates are expected to be accumulated in ECA mutants, we and others have  
336 also observed the corresponding DAG-PP-linked species [39]. Specifically, we have detected  
337 DAG-PP-GlcNAc only in the IM of the  $\Delta wecC/\Delta wecG$  strains (Fig 5), suggesting that such species  
338 are not transported to the OM. Intriguingly, the novel DAG-PP-linked species are structurally  
339 similar to PLs, which have polar headgroups linked to DAG-P (i.e. phosphatidic acid) (Fig 3A).  
340 Therefore, they could serve as substrate mimics of the yet-to-be-identified anterograde PL  
341 transport machinery, thereby inhibiting the process at the IM. Studies are underway to test this  
342 hypothesis.

343 How DAG-PP-linked species are made is unclear. In the canonical ECA pathway, the final  
344 polymer on the und-PP carrier is transferred via an unknown mechanism to give  $ECA_{PG}$ , a  
345 DAG-P-linked polymer, at the outer leaflet of the IM [18]. It is therefore conceivable that  
346 DAG-PP-linked species are also derived from und-PP-linked ECA intermediates in a similar  
347 fashion. That the flippase WzxE has been shown to transport an analog of Lipid I<sup>ECA</sup> across the IM  
348 [28] suggests the possibility that early ECA biosynthetic intermediates can reach the outer leaflet  
349 of the IM, and somehow be converted to DAG-PP-linked species. The resulting location of these  
350 species would make sense in the proposed context of interaction with, and inhibition of, an

351 anterograde PL transport pathway, which presumably accepts substrates from the outer leaflet of  
352 the IM. This model is also consistent with the observation that removing WzzE, which causes  
353 accumulation of short chain ECA intermediates in the outer leaflet of the IM, similarly rescues OM  
354 phenotypes in *tol-pal* mutant strains (Fig 4A).

355 It is quite remarkable that our approach led to the identification of genetic interactions  
356 between the ECA pathway and OM lipid transport in *E. coli*. After they are synthesized, ECA<sub>PG</sub>  
357 are transported to the OM. The mechanism for this process is not clear, but may require a system  
358 that is similar to, if not the same as, any pathway(s) for anterograde PL transport. If this were the  
359 case, the idea that DAG-PP-linked species could interfere with PL transport seems reasonable.  
360 Further investigation into the final stages of ECA assembly and transport will be required to  
361 elucidate interactions between these pathways and eventually provide new insights into lipid  
362 trafficking across the cell envelope.

363

364

365 **Materials and methods**

366

367 **Strains and growth conditions.** All the strains used in this study are listed in S2 Table.

368 *Escherichia coli* strain MC4100 [*F* *araD139*  $\Delta$ (*argF-lac*) *U169 rpsL150 relA1 flbB5301 ptsF25*

369 *deoC1 ptsF25 thi*] [45] was used as the wild-type (WT) strain for most of the experiments.

370 NR754, an *araD*<sup>+</sup> revertant of MC4100 [46], was used as the WT strain for experiments

371 involving depletion of *wzxE* or *wzyE* from the arabinose-inducible promoter ( $P_{BAD}$ ). Gene

372 deletion mutants were constructed using recombineering [47] or obtained from the Keio

373 collection [35]. Whenever needed, the antibiotic resistance cassettes were flipped out as

374 described [47]. Gene deletion cassettes were transduced into relevant genetic background strains

375 via P1 transduction [48]. The unmarked and chromosomal *wecC*\* allele was constructed using a

376 negative selection technique [21]. Luria-Bertani (LB) broth (1% tryptone and 0.5% yeast extract,

377 supplemented with 1% NaCl) and agar were prepared as previously described [48]. When

378 appropriate, kanamycin (kan; 25  $\mu\text{g ml}^{-1}$ ), chloramphenicol (cm; 30  $\mu\text{g ml}^{-1}$ ), ampicillin (amp;

379 200  $\mu\text{g ml}^{-1}$ ) and spectinomycin (spec; 50  $\mu\text{g ml}^{-1}$ ) were added.

380

381 **Plasmid construction.** Plasmids used in this study are listed in S3 Table. Desired genes were

382 amplified from MC4100 chromosomal DNA using the indicated primers (sequences in S4

383 Table). Amplified products were digested with indicated restriction enzymes (New England

384 Biolabs), which were also used to digest the carrying vector. After ligation, recombinant

385 plasmids were transformed into competent NovaBlue (Novagen) cells and selected on LB plates

386 containing appropriate antibiotics. DNA sequencing (Axil Scientific, Singapore) was used to  
387 verify the sequence of the cloned gene.

388

389 **Generation of suppressor mutations and genome sequencing.** To isolate spontaneous  
390 suppressor mutants,  $10^9$  BW25113  $\Delta tol-pal^{\#}$  cells were plated on LB agar plate supplemented  
391 with vancomycin (250  $\mu$ g/ml) and incubated at 37°C for 48 h. Individual colonies were picked  
392 and restreaked on similar plates to verify their vancomycin resistance properties. 36 separate  
393 strains were isolated and classified into four classes based on their antibiotic susceptibilities (see  
394 text). To identify the genetic location of mutations in Class I suppressor mutant strains, whole  
395 genome sequencing was performed. Purified genomic DNA was sheared to approximately 300  
396 bp using a focused ultrasonicator (Covaris). A sequencing library was prepared using the TruSeq  
397 DNA PCR Free Kit (Illumina) according to the manufacturer's instructions. This was sequenced  
398 using a HiSeq 4000 with  $2 \times 151$  bp reads. Raw FASTQ files were mapped to the *E. coli* W3110  
399 genome sequence (NC\_007779.1) using bwa (version 0.7.10) [49]; indel realignment and SNP  
400 (single nucleotide polymorphism) calling was performed using Lofreq\* (version 2.1.2) with  
401 default parameters [50]. Resulting variants were assigned to associated genes and amino acid  
402 changes using the Genbank Refseq W3110 annotation.

403

404 **Antibiotic sensitivity assay.** Sensitivity against different antibiotics was judged by efficiency of  
405 plating (EOP) analyses on LB agar plates containing indicated concentrations of drugs. Briefly,  
406 5-ml cultures were grown (inoculated with overnight cultures at 1:100 dilution) in LB broth at

407 37°C until OD<sub>600</sub> reached ~0.6. Cells were normalized according to OD<sub>600</sub>, first diluted to OD<sub>600</sub>  
408 = 0.1 (~10<sup>8</sup> cells), and then serially diluted in LB with six 10-fold dilutions using 96-well  
409 microtiter plates (Corning). Two microliters of the diluted cultures were manually spotted onto  
410 the plates and incubated overnight at 37°C.

411

412 **RNase I leakage assay.** Measurement of RNase I leakiness was performed using a plate assay as  
413 described before [51]. Briefly, 5-ml cultures were grown (inoculated with overnight cultures at  
414 1:100 dilution) in LB broth at 37°C until OD<sub>600</sub> reached ~0.6. Cells were normalized to OD<sub>600</sub> =  
415 0.001, and two microliters (~2,000 cells) were manually spotted onto LB agar plates containing  
416 1.9 mg/ml yeast RNA extract (Sigma). The plates were incubated overnight at 37°C. To  
417 precipitate and visualize RNA, the plates were overlaid with cold (12.5% v/v) trichloroacetic  
418 acid.

419

420 **Microscopy.** 5-ml cultures were grown (inoculated with overnight cultures at 1:100 dilution) in  
421 LB broth at 37°C until OD<sub>600</sub> reached ~0.5 – 0.6. 5-μl cells were spotted onto freshly prepared 1%  
422 agarose pads prepared in LB broth. Images were acquired using a FV1000 confocal microscope  
423 (Olympus Fluoview FV1000, Tokyo, Japan) equipped with a 100x UPlanS Apo 1.4 NA oil  
424 immersion objective and the Olympus Fluoview software. For each sample, the lengths and  
425 widths of 100 cells were measured in Image J [52] and plotted using Graphpad prism 6.

426

427  **$\sigma^E$  reporter assay.** Strains with plasmid expressing *rpoHP3::gfp* or promoterless *gfp* were grown  
428 to mid-logarithmic phase ( $OD_{600} \approx 0.4-0.6$ ), then normalized and re-suspended in 150 mM NaCl.  
429 Fluorescence level (Ex: 485 nm and Em: 535 nm) of equal amount of cells were measured for  
430 each strain using the Victor X4 plate reader (Perkin Elmer). Relative levels of  $\sigma^E$  activation  
431 correlates with the expression of GFP due to specific activation of *rpoHP3* promoter and were  
432 determined by normalizing the fluorescence level in strains with *rpoHP3::gfp* to the basal  
433 fluorescence level in strains expressing *gfp* without promoter. Data from three independent  
434 experiments were collected and normalized to the  $\sigma^E$  activation level in WT.

435

436 **Lipid extraction and liquid chromatography-mass spectrometry (LC-MS) analysis.** To  
437 prepare the lipid extracts, a modified Bligh and Dyer method was used as described previously  
438 [53]. Briefly, bacterial pellets were resuspended in PBS, and chloroform:methanol (1:2, v/v) was  
439 added. The mixture was vortexed thoroughly before incubation with shaking at 1,000 rpm, 4°C.  
440 Subsequently, water and chloroform were added to each sample to generate a two-phase  
441 Bligh-Dyer mixture. The two phases were separated via centrifugation and the lower organic  
442 phase was collected in a new tube. The aqueous phase was re-extracted twice with chloroform,  
443 and all the organic extracts pooled and dried using a Centrivap and stored at -80°C until use.

444 The lipid samples were reconstituted in chloroform:methanol (1:1, v/v) and analyzed using a  
445 high performance chromatography system (1260 Agilent Infinity Quaternary Pump) coupled to  
446 an SCIEX QTOF 6600 mass spectrometer in negative electrospray ionization mode. Mass  
447 calibration is performed every 5 h, using the automated calibration solution (SCIEX, Canada).

448 For lipid separation, normal phase chromatography was performed as previously described [53].  
449 For characterization of the DAG-PP species using tandem mass spectrometry, multiple collision  
450 energies ranging from -55 V to -85 V were used. MS and MS/MS spectra obtained were  
451 visualized using Peak View (SCIEX) and graphical representations of the selected peaks of  
452 interests were plotted using sigmaplot v10.0.

453

454 **OMV and membrane lipid composition analyses.** Steady-state [<sup>3</sup>H]-glycerol-labelled PL  
455 distributions in IMs/OMs, OMV levels, as well as PL/LPS ratios in [<sup>14</sup>C]-acetate labelled  
456 OMs/OMVs (see S7 Fig for workflow and raw data) were determined using methods previously  
457 described [12].

458

459 **Phosphatidylglycerol (PG)/cardiolipin (CL) turnover assay.** Retrograde transport of OM  
460 PG/CL can be inferred from turnover processes in the IM, which were monitored via [<sup>32</sup>P]-pulse  
461 chase experiments as previously described [12].

462

463 **SDS-PAGE and immunoblotting.** SDS-PAGE was performed according to Laemmli using the  
464 12% or 15% Tris.HCl gels [54]. For ECA, cell samples were treated with proteinase K (0.25  
465 mg/ml) at 55°C for 1 h before loading and resolving on 10% Tricine SDS-PAGE gels.  
466 Immunoblotting was performed by transferring from the gels onto polyvinylidene fluoride  
467 (PVDF) membranes (Immun-Blot® 0.2 µm, Bio-Rad) using the semi-dry electroblotting system  
468 (Trans-Blot® Turbo™ Transfer System, Bio-Rad). Membranes were blocked using 1X casein

469 blocking buffer (Sigma). Rabbit  $\alpha$ -LptE (from Daniel Kahne) was used at 1:5,000 dilutions.  
470 Rabbit polyclonal  $\alpha$ -ECA<sub>CYC</sub> antisera (generous gift from Jolanta Lukasiewicz), which reacts  
471 with all forms of ECA (ECA<sub>CYC</sub>, ECA<sub>LPS</sub>, ECA<sub>PG</sub>), was used at 1:800 dilution [55]. Mouse  
472 monoclonal  $\alpha$ -LPS antibody (against LPS-core) was purchased from Hycult biotechnology and  
473 used at 1:5,000 dilutions.  $\alpha$ -mouse IgG secondary antibody conjugated to HRP (from sheep) and  
474  $\alpha$ -rabbit IgG secondary antibody conjugated to HRP (from donkey) were purchased from GE  
475 Healthcare and used at 1:5,000 dilutions. Luminata Forte Western HRP Substrate (Merck  
476 Milipore) was used to develop the membranes and chemiluminescent signals were visualized by  
477 G:BOX Chemi XT 4 (Genesys version1.3.4.0, Syngene).  
478



479 **Acknowledgements**

480

481 X.E.J., R.S., and W.B.T. performed most of the experiments described in this work; S.L.C.  
482 analyzed the whole genome sequencing data of suppressor mutants; D.C.C.S. and X.L.G.  
483 performed the MS experiments; S.-S.C. directed and supervised the work; X.E.J., R.S., W.B.T.,  
484 and S.-S.C. analyzed the data and wrote the paper; all authors provided critical feedback of the  
485 manuscript. We thank Majid Eshaghi (Genome Institute of Singapore, GIS) for providing  $\sigma^E$   
486 reporter plasmids and Kevin Young (University of Arkansas for Medical Sciences) for the  
487 generous gifts of the  $\Delta wcaJ$  strain and the *uppS* overexpression plasmid. We are grateful to Jolanta  
488 Łukasiewicz (Polish Academy of Sciences) and Daniel Kahne (Harvard University) for the  $\alpha$ -ECA  
489 and  $\alpha$ -LptE antibodies, respectively. We also thank William F. Burkholder (CZ Biohub) for useful  
490 discussions. WGS work was partially supported by the GIS, and the Singapore Ministry of Health  
491 National Medical Research Council (NMRC/CIRG/1357/2013) to S.L.C.. Lipid MS analysis was  
492 supported by the Nanyang Assistant Professorship to X.L.G.. All other work were supported by  
493 the National University of Singapore Start-up funding, the Singapore Ministry of Education  
494 Academic Research Fund Tier 1 Grant, and the Singapore Ministry of Health National Medical  
495 Research Council under its Cooperative Basic Research Grant (NMRC/CBRG/0072/2014) to  
496 S.-S.C.. The authors declare no conflict of interest.

497 **References**

498

499 1. Nikaido H. Molecular basis of bacterial outer membrane permeability revisited. *Microbiol Mol*  
500 *Biol Rev.* 2003;67: 593–656.

501 2. Raetz CR, Whitfield C. Lipopolysaccharide endotoxins. *Annu Rev Biochem.* 2002;71:  
502 635–700.

503 3. Okuda S, Sherman DJ, Silhavy TJ, Ruiz N, Kahne D. Lipopolysaccharide transport and  
504 assembly at the outer membrane: the PEZ model. *Nat Rev Microbiol.* 2016;14: 337–345.

505 4. Hagan CL, Silhavy TJ, Kahne D.  $\beta$ -barrel membrane protein assembly by the Bam complex.  
506 *Annu Rev Biochem.* 2011;80: 189–210.

507 5. Okuda S, Tokuda H. Lipoprotein sorting in bacteria. *Annu Rev Microbiol.* 2011;65: 239–259.

508 6. Donohue-Rolfe AM, Schaechter M. Translocation of phospholipids from the inner to the outer  
509 membrane of *Escherichia coli*. *Proc Natl Acad Sci USA.* 1980;77: 1867–1871.

510 7. Jones NC, Osborn MJ. Translocation of phospholipids between the outer and inner membranes  
511 of *Salmonella typhimurium*. *J Biol Chem.* 1977;252: 7405–7412.

512 8. Langley KE, Hawrot E, Kennedy EP. Membrane assembly: movement of phosphatidylserine  
513 between the cytoplasmic and outer membranes of *Escherichia coli*. *J Bacteriol.* 1982;152:  
514 1033–1041.

515 9. Grabowicz M, Silhavy TJ. Envelope stress responses: an interconnected safety net. *Trends Cell*  
516 *Biol.* 2017;42: 232–242.

- 517 10. Raivio TL. Everything old is new again: an update on current research on the Cpx envelope  
518 stress response. *Biochim Biophys Acta*. 2014;1843: 1529–1541.
- 519 11. Majdalani N, Gottesman S. The Rcs phosphorelay: a complex signal transduction system.  
520 *Annu Rev Microbiol*. 2005;59: 379–405.
- 521 12. Shrivastava R, Xiang’Er J, Chng SS. Outer membrane lipid homeostasis via retrograde  
522 phospholipid transport in *Escherichia coli*. *Mol Microbiol*. 2017;106: 395–408.
- 523 13. Lloubes R, Cascales E, Walburger A, Bouveret E, Lazdunski C, Bernadac A, Journet L. The  
524 Tol-Pal proteins of the *Escherichia coli* cell envelope: an energized system required for outer  
525 membrane integrity? *Res Microbiol*. 2001;152: 523–529.
- 526 14. Sturgis JN. Organisation and evolution of the *tol-pal* gene cluster. *J Mol Microbiol*  
527 *Biotechnol*. 2001;3: 113–122.
- 528 15. Cascales E, Gavioli M, Sturgis JN, Lloubes R. Proton motive force drives the interaction of  
529 the inner membrane TolA and outer membrane Pal proteins in *Escherichia coli*. *Mol*  
530 *Microbiol*. 2000;38: 904–915.
- 531 16. Bernadac A, Gavioli M, Lazzaroni JC, Raina S, Lloubes R. *Escherichia coli tol-pal* mutants  
532 form outer membrane vesicles. *J Bacteriol*. 1998;180: 4872–4878.
- 533 17. Gerding MA, Ogata Y, Pecora ND, Niki H, de Boer PAJ. The trans-envelope Tol-Pal  
534 complex is part of the cell division machinery and required for proper outer-membrane  
535 invagination during cell constriction in *E. coli*. *Mol Microbiol*. 2007;63: 1008–1025.
- 536 18. Kuhn H, Meier-Dieter U, Mayer H. ECA, the enterobacterial common antigen. *FEMS*  
537 *Microbiol Lett*. 1988;54: 195–222.

- 538 19. Krishnamoorthy G, Wolloscheck D, Weeks JW, Croft C, Rybenkov VV, Zgurskaya HI.  
539 Breaking the permeability barrier of *Escherichia coli* by controlled hyperporination of the  
540 outer membrane. *Antimicrob Agents Chemother.* 2016;60: 7372–7381.
- 541 20. Meier-Dieter U, Starman R, Barr K, Mayer H, Rick PD. Biosynthesis of enterobacterial  
542 common antigen in *Escherichia coli*. Biochemical characterization of *Tn10* insertion mutants  
543 defective in enterobacterial common antigen synthesis. *J Biol Chem.* 1990;265: 13490–13497.
- 544 21. Khetrapal V, Mehershahi K, Rafee S, Chen S, Lim CL, Chen SL. A set of powerful negative  
545 selection systems for unmodified Enterobacteriaceae. *Nucleic Acids Res.* 2015;43: e83.
- 546 22. Castelli ME, Vécovi EG. The Rcs signal transduction pathway is triggered by enterobacterial  
547 common antigen structure alterations in *Serratia marcescens*. *J Bacteriol.* 2011;193: 63–74.
- 548 23. Clavel T, Lazzaroni JC, Vianney A, Portalier R. Expression of the *tolQRA* genes of  
549 *Escherichia coli* K-12 is controlled by the RcsC sensor protein involved in capsule synthesis.  
550 *Mol Microbiol.* 1996;19: 19–25.
- 551 24. Stout V, Gottesman S. RcsB and RcsC: a two-component regulator of capsule synthesis in  
552 *Escherichia coli*. *J Bacteriol.* 1990;172: 659–669.
- 553 25. Trisler P, Gottesman S. Ion transcriptional regulation of genes necessary for capsular  
554 polysaccharide synthesis in *Escherichia coli* K-12. *J Bacteriol.* 1984;160: 184–191.
- 555 26. Stevenson G, Andrianopoulos K, Hobbs M, Reeves PR. Organization of the *Escherichia coli*  
556 K-12 gene cluster responsible for production of the extracellular polysaccharide colanic acid. *J*  
557 *Bacteriol.* 1996;178: 4885–4893.

- 558 27. Rahman A, Barr K, Rick PD. Identification of the structural gene for the TDP-Fuc4NAc:lipid  
559 II Fuc4NAc transferase involved in synthesis of enterobacterial common antigen in *Escherichia*  
560 *coli* K-12. J Bacteriol. 2001;183: 6509–6516.
- 561 28. Rick PD, Barr K, Sankaran K, Kajimura J, Rush JS, Waechter CJ. Evidence that the *wzxE* gene  
562 of *Escherichia coli* K-12 encodes a protein involved in the transbilayer movement of a  
563 trisaccharide-lipid intermediate in the assembly of enterobacterial common antigen. J Biol  
564 Chem. 2003;278: 16534–16542.
- 565 29. Kajimura J, Rahman A, Rick PD. Assembly of cyclic enterobacterial common antigen in  
566 *Escherichia coli* K-12. J Bacteriol. 2005;187: 6917–6927.
- 567 30. Barr K, Klena J, Rick PD. The modality of enterobacterial common antigen polysaccharide  
568 chain lengths is regulated by o349 of the *wec* gene cluster of *Escherichia coli* K-12. J Bacteriol.  
569 1999;181: 6564–6568.
- 570 31. Kuhn HM, Neter E, Mayer H. Modification of the lipid moiety of the enterobacterial common  
571 antigen by the “Pseudomonas factor”. Infect Immun. 1983;40: 696–700.
- 572 32. Rinno J, Golecki JR, Mayer H. Localization of enterobacterial common antigen: immunogenic  
573 and nonimmunogenic enterobacterial common antigen-containing *Escherichia coli*. J Bacteriol.  
574 1980;141: 814–821.
- 575 33. Acker G, Bitter-Suermann D, Meier-Dieter U, Peters H, Mayer H. Immunocytochemical  
576 localization of enterobacterial common antigen in *Escherichia coli* and *Yersinia enterocolitica*  
577 cells. J Bacteriol. 1986;168: 348–356.

- 578 34. Meier-Dieter U, Barr K, Starman R, Hatch L, Rick PD. Nucleotide sequence of the *Escherichia*  
579 *coli rfe* gene involved in the synthesis of enterobacterial common antigen. Molecular cloning of  
580 the *rfe-rff* gene cluster. J Biol Chem. 1992;267: 746–753.
- 581 35. Baba T, Ara T, Hasegawa M, Takai Y, Okumura Y, Baba M, Datsenko KA, Tomita M, Wanner  
582 BL, Mori H. Construction of *Escherichia coli* K-12 in-frame, single-gene knockout mutants:  
583 the Keio collection. Mol Syst Biol. 2006;2: 2006.0008.
- 584 36. MacCain WJ, Kannan S, Jameel DZ, Troutman JM, Young KD. A defective undecaprenyl  
585 pyrophosphate synthase induces growth and morphological defects that are suppressed by  
586 mutations in the isoprenoid pathway of *Escherichia coli*. J Bacteriol. 2018;200: e00255-18.
- 587 37. Jorgenson MA, Kannan S, Laubacher ME, Young KD. Dead-end intermediates in the  
588 enterobacterial common antigen pathway induce morphological defects in *Escherichia coli* by  
589 competing for undecaprenyl phosphate. Mol Microbiol. 2016;100: 1–14.
- 590 38. Danese PN, Oliver GR, Barr K, Bowman GD, Rick PD, Silhavy TJ. Accumulation of the  
591 enterobacterial common antigen lipid II biosynthetic intermediate stimulates *degP* transcription  
592 in *Escherichia coli*. J Bacteriol. 1998;180: 5875–5884.
- 593 39. Rick PD, Hubbard GL, Kitaoka M, Nagaki H, Kinoshita T, Dowd S, Simplaceanu V, Ho C.  
594 Characterization of the lipid-carrier involved in the synthesis of enterobacterial common  
595 antigen (ECA) and identification of a novel phosphoglyceride in a mutant of *Salmonella*  
596 *typhimurium* defective in ECA synthesis. Glycobiology. 1998;8: 557–567.
- 597 40. Oursel D, Loutelier-Bourhis C, Orange N, Chevalier S, Norris V, Lange CM. Lipid  
598 composition of membranes of *Escherichia coli* by liquid chromatography/tandem mass

- 599 spectrometry using negative electrospray ionization. *Rapid Commun Mass Spectrom.* 2018;21:  
600 1721–1728.
- 601 41. McMahon KJ, Castelli ME, Garcia Vescovi E, Feldman MF. Biogenesis of outer membrane  
602 vesicles in *Serratia marcescens* is thermoregulated and can be induced by activation of the Rcs  
603 phosphorelay system. *J Bacteriol.* 2012;194: 3241–3249.
- 604 42. Masilamani R, Cian MB, Dalebroux ZD. *Salmonella* Tol-Pal reduces outer membrane  
605 glycerophospholipid levels for envelope homeostasis and survival during bacteremia. *Infect*  
606 *Immun.* 2018;86: e00173–18.
- 607 43. Mitchell AM, Srikumar T, Silhavy TJ. Cyclic enterobacterial common antigen maintains the  
608 outer membrane permeability barrier of *Escherichia coli* in a manner controlled by YhdP.  
609 *MBio.* 2018;9: e01321–18.
- 610 44. Jorgenson MA, Young KD. Interrupting biosynthesis of O antigen or the lipopolysaccharide  
611 core produces morphological defects in *Escherichia coli* by sequestering undecaprenyl  
612 phosphate. *J Bacteriol.* 2016;198: 3070–3079.
- 613 45. Casadaban MJ. Transposition and fusion of the *lac* genes to selected promoters  
614 in *Escherichia coli* using bacteriophage lambda and Mu. *J Mol Biol.* 1976;104: 541–555.
- 615 46. Ruiz N, Gronenberg LS, Kahne D, Silhavy TJ. Identification of two inner-membrane proteins  
616 required for the transport of lipopolysaccharide to the outer membrane of *Escherichia coli*.  
617 *Proc Natl Acad Sci USA.* 2008;105: 5537–5542.
- 618 47. Datsenko KA, Wanner BL. One-step inactivation of chromosomal genes in *Escherichia coli*  
619 K-12 using PCR products. *Proc Natl Acad Sci USA.* 2008;97: 6640–6645.

- 620 48. Silhavy TJ, Berman ML, Enquist LW. Experiments with Gene fusions. New York: Cold  
621 Spring Harbor Laboratory; 1984.
- 622 49. Li H, Durbin R. Fast and accurate short read alignment with Burrows-Wheeler Transform.  
623 Bioinformatics. 2009;25: 1754–60.
- 624 50. Wilm A, Aw PP, Bertland D, Yeo GH, Ong SH, Wong CH, Khor CC, Petric R, Hibberd ML,  
625 Nagarajan N. LoFreq: a sequence-quality aware, ultra-sensitive variant caller for uncovering  
626 cell-population heterogeneity from high-throughput sequencing datasets. Nucleic Acids Res.  
627 2012;40: 11189–11201.
- 628 51. Lazzaroni JC, Portalier RC. Isolation and preliminary characterization of periplasmic-leaky  
629 mutants of *Escherichia coli* K-12. FEMS Microbiol Lett. 1979;5: 411–416.
- 630 52. Schneider CA, Rasband WS, Eliceiri KW. NIH image to ImageJ: 25 years of image analysis.  
631 Nat methods. 2012;9: 671–675.
- 632 53. Guan XL, Mäser P. Comparative sphingolipidomics of disease-causing trypanosomatids reveal  
633 unique lifecycle- and taxonomy-specific lipid chemistries. Sci Rep. 2017;7: 13617.
- 634 54. Laemmli UK. Cleavage of structural proteins during the assembly of the head of  
635 bacteriophage T4. Nature. 1970;227: 680–685.
- 636 55. Gozdziewicz TK, Lugowski C, Lukasiwicz J. First evidence for a covalent linkage between  
637 enterobacterial common antigen and lipopolysaccharide in *Shigella sonnei* phase II ECALPS.  
638 J Biol Chem. 2014;289: 2745–2754.
- 639 56. Hawrot E, Kennedy EP. Phospholipid composition and membrane function in  
640 phosphatidylserine decarboxylase mutants of *Escherichia coli*. J Biol Chem. 1978;253:



- 641 8213–8220.
- 642 57. Raivio TL, Popkin DL, Silhavy TJ. The Cpx envelope stress response is controlled by  
643 amplification and feedback inhibition. *J Bacteriol.* 1999;181: 5263–5272.
- 644 58. Cherepanov PP, Wackernagel W. Gene disruption in *Escherichia coli*: TcR and KmR  
645 cassettes with the option of Flp catalyzed excision of the antibiotic-resistance determinant.  
646 *Gene.* 1995;158: 9–14.
- 647 59. Pitre A, Pan Y, Pruett S, Skalli O. On the use of ratio standard curves to accurately quantitate  
648 relative changes in protein levels by western blot. *Anal Biochem.* 2007;361: 305–307.
- 649 60. Yokoto K, Kito M. Transfer of the phosphatidyl moiety of phosphatidylglycerol to  
650 phosphatidylethanolamine in *Escherichia coli*. *J Bacteriol.* 1982;151: 952–961.
- 651 61. Audet A, Cole R, Proulx P. Polyglycerophosphatide metabolism in *Escherichia coli*. *Biochim*  
652 *Biophys Acta.* 1975;380: 414–420.

653 **Figure legends**

654

655 **Fig 1** Loss-of-function mutations in the ECA pathway rescue vancomycin sensitivity in *tol-pal*  
656 mutants. Vancomycin sensitivity of indicated *tol-pal* strains with or without (A) *wecC\**, (B)  
657  $\Delta wecC$ , and (D)  $\Delta wecB/\Delta wecF$  mutations based on efficiency of plating (EOP) on LB agar plates  
658 supplemented with vancomycin (120  $\mu\text{g/ml}$ ). (C) ECA levels in WT and  $\Delta tolA$  strains with or  
659 without *wecC\** and  $\Delta wecC$  mutations as judged by immunoblot analysis using  $\alpha$ -ECA antibody.  
660 Samples were normalized by  $\text{OD}_{600}$  and treated with proteinase K prior to Tricine  
661 SDS-PAGE/immunoblotting.

662

663 **Fig 2** Restoration of OM permeability defects by  $\Delta wecC$  in cells lacking TolA does not require the  
664 Rcs phosphorelay cascade and/or capsular polysaccharide biosynthesis. (A) Vancomycin  
665 sensitivity of indicated strains in either  $\Delta rcsC$  or  $\Delta wcaJ$  backgrounds based on EOP on LB agar  
666 plates supplemented with vancomycin (120  $\mu\text{g/ml}$ ). (B) RNase I leakage in the same strains as  
667 (A), as judged by RNA degradation (halo formation) around cells spotted on LB agar plates  
668 containing yeast RNA, subsequently precipitated with trichloroacetic acid.

669

670 **Fig 3** Accumulation of ECA biosynthetic intermediates restores vancomycin resistance in cells  
671 lacking TolA. (A) Schematic of the ECA biosynthetic pathway illustrating  
672 und-PP-GlcNAc-ManNAcA-Fuc4NAc (Lipid III<sup>ECA</sup>) synthesis at the inner leaflet of IM, and  
673 subsequent polymerization at the outer leaflet. The final ECA polymer (ECA<sub>PG</sub>) is attached to a

674 phosphoglyceride (i.e. diacylglycerol-phosphate (DAG-P) aka phosphatidic acid) and transported  
675 to the OM. Chemical structures of und-PP and DAG-P anchors are shown. (B, C) Vancomycin  
676 sensitivity of the  $\Delta wcaJ \Delta tolA$  strain with or without indicated *wec* mutations in otherwise (B)  
677 WT or (C)  $\Delta wecA$  backgrounds, based on efficiency of plating (EOP) on LB agar plates  
678 supplemented with vancomycin (120 ug/ml).

679

680 **Fig 4** Partial accumulation of Lipid III<sup>ECA</sup> and/or short chain ECA rescues vancomycin  
681 sensitivity in cells lacking TolA. (A) Vancomycin sensitivity of the  $\Delta wcaJ \Delta tolA$  strain with or  
682 without  $\Delta wzzE$  mutation in otherwise WT or  $\Delta wecA$  backgrounds, based on efficiency of plating  
683 (EOP) on LB agar plates supplemented with vancomycin (120 ug/ml). (B) ECA profiles in the  
684 indicated  $\Delta wcaJ$  strains as judged by immunoblot analysis using  $\alpha$ -ECA antibody. Samples were  
685 normalized by OD<sub>600</sub> and treated with proteinase K prior to Tricine SDS-PAGE/immunoblotting.  
686 Profiles in strains progressively depleted of *wzyE* are used to visualize accumulation of Lipid  
687 III<sup>ECA</sup>. Relative band intensities from ECA profiles of WT,  $\Delta wzzE$ , and *wzyE*-depleted (\*) strains  
688 are shown on the right.

689

690 **Fig 5** Strains lacking WecG or WecC accumulate DAG-PP-GlcNAc species in the IM. (A) Ion  
691 chromatogram (XIC) of 34:1 DAG-PP-GlcNAc (m/z 956.5243) extracted from LC-MS analyses  
692 of total lipids isolated from indicated  $\Delta wcaJ$  strains. Inset, XICs of corresponding 32:1 (m/z  
693 928.4927), 34:2 (954.5076) and 36:1 (m/z 982.5391) species. (B) Mass spectra obtained from  
694 integration of XIC peak region in (A) of  $\Delta wcaJ$  (WT) and  $\Delta wcaJ \Delta wecG$  strains. WT peaks

695 (black) are overlaid on top of  $\Delta wccG$  peaks (red), illustrating unique DAG-PP-GlcNAc signals in  
696 the latter strain. (C) XICs of 34:1 DAG-PP-GlcNAc ( $m/z$  956.5243) extracted from LC-MS  
697 analyses of IM lipids isolated from indicated  $\Delta wcaJ$  strains. Inset, XICs of the same species from  
698 OM lipids.

699

700 **Fig 6** The chemical structures of DAG-PP-GlcNAc species are deduced from MS fragmentation  
701 analysis. (A) Proposed fragmentation pattern with mass assignments of 32:1 and 34:1  
702 DAG-PP-GlcNAc species. (B and C) MS/MS spectra of (B) 32:1 and (C) 34:1 DAG-PP-GlcNAc  
703 species at indicated collision energies. Spectrum at high collision energy (-75 V, red) is overlaid  
704 on top of that at low collision energy (-55 V, black).

705

706 **Fig 7** Accumulation of ECA intermediates restores OM lipid homeostasis in cells lacking TolA.  
707 (A) *left*, Representative [ $^3\text{H}$ ]-distribution profiles of cell lysates from indicated  $\Delta wcaJ$  strains,  
708 fractionated on sucrose density gradients. Cells were grown in the presence of [ $2\text{-}^3\text{H}$ ]glycerol to  
709 specifically label PLs in the IMs and OMs. Total [ $^3\text{H}$ ]-activities detected in IM (6–10) and OM  
710 (12–14) fractions were expressed as a percentage of their sums, averaged across three replicate  
711 experiments. *right*, Steady-state distribution of [ $^3\text{H}$ ]-glycerol labelled PLs between the IM and  
712 the OM of indicated  $\Delta wcaJ$  strains (*left panel*). Distribution of [ $^3\text{H}$ ]-labelled PLs in the OMs of  
713 respective mutants expressed as fold changes relative to the WT OM (*right panel*). (B)  
714 Steady-state PL:LPS ([ $^{14}\text{C}$ ]-acetate labelled) ratios in the OMs and OMVs of indicated  $\Delta wcaJ$   
715 strains (*left panel*). OM PL:LPS ratios of respective mutants, and OMV PL:LPS ratios of  $\Delta tolA$

716 and  $\Delta tolA \Delta wecC$  mutant strains, expressed as fold changes relative to that in the WT OM (*right*  
717 *panel*). Error bars represent standard deviations calculated from triplicate experiments. Student's  
718 t-tests: \*  $p < 0.05$  (as compared to WT).

719

720 **Supporting information legend**

721

722 **S1 Appendix** (includes S1-S10 Fig, S1-S4 Table)

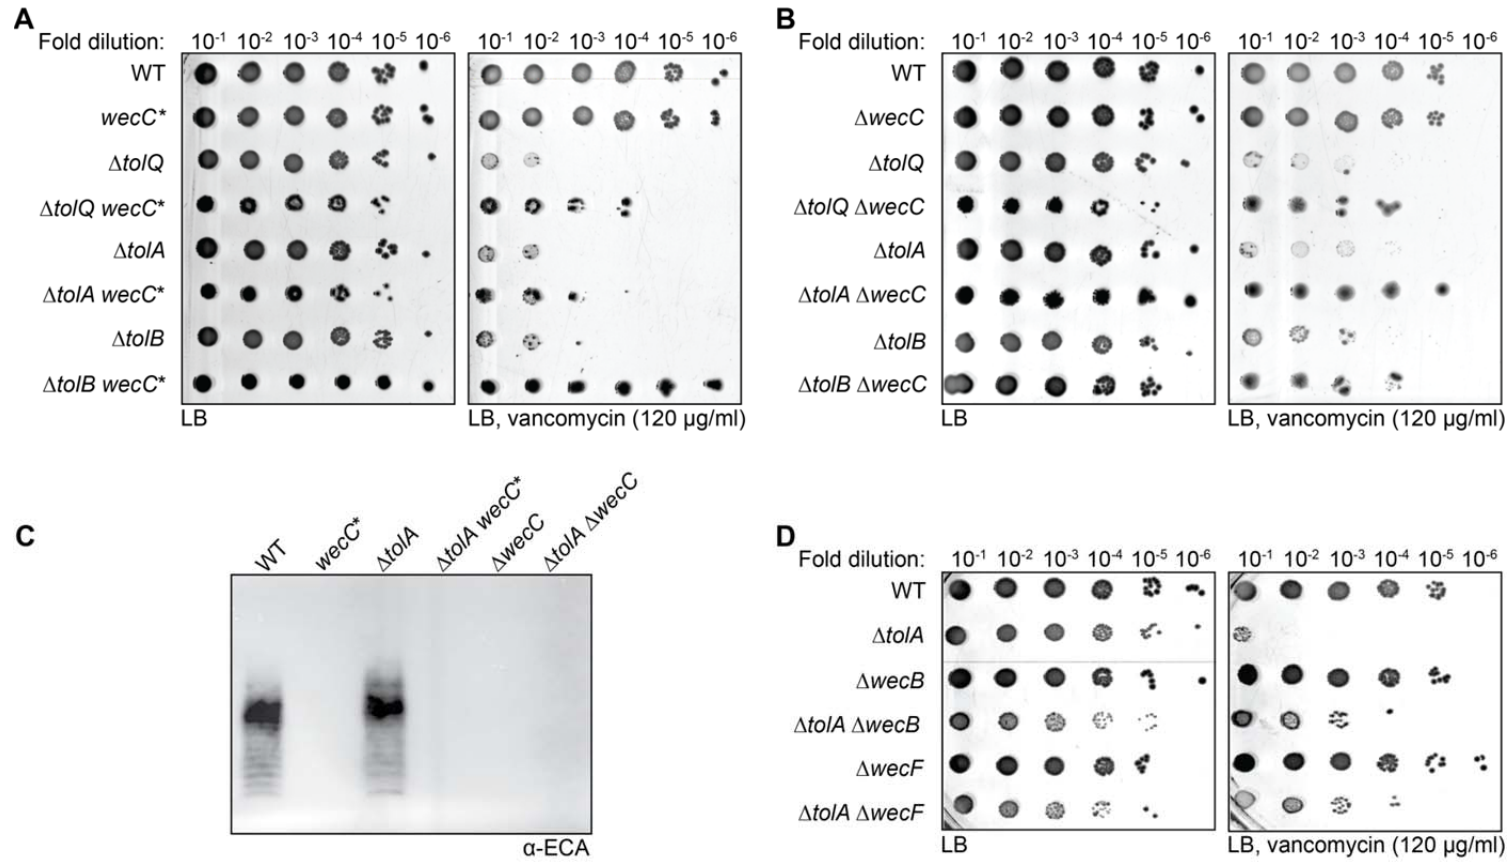

**Fig 1**

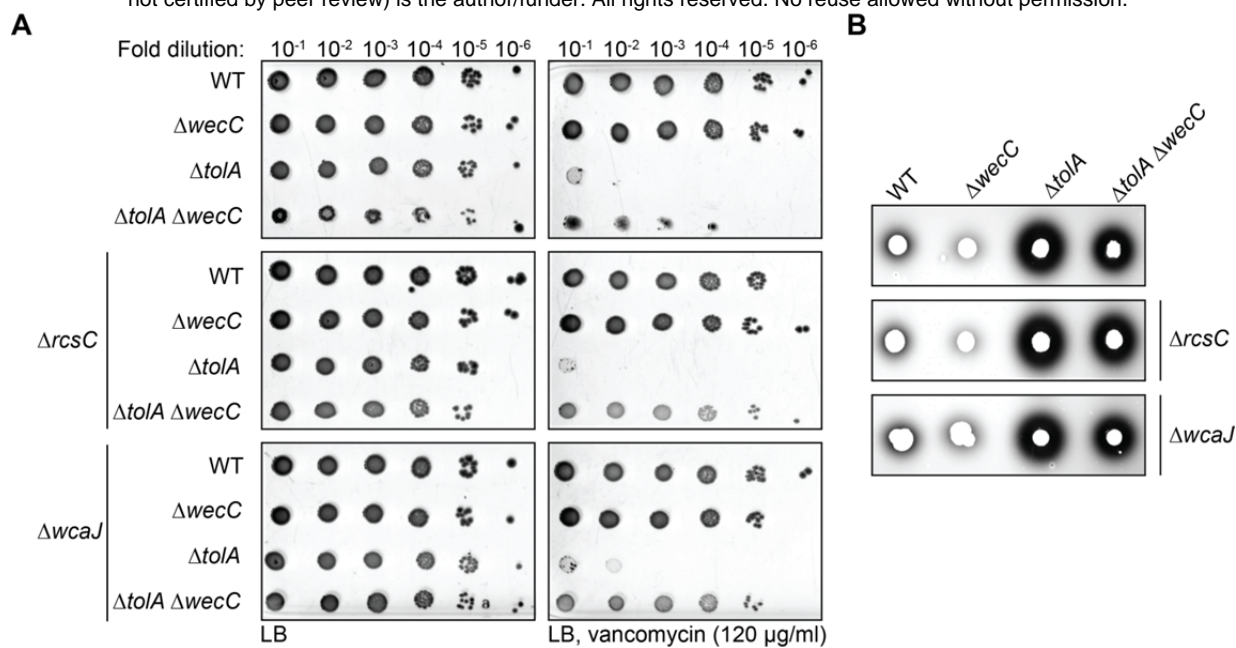

**Fig 2**

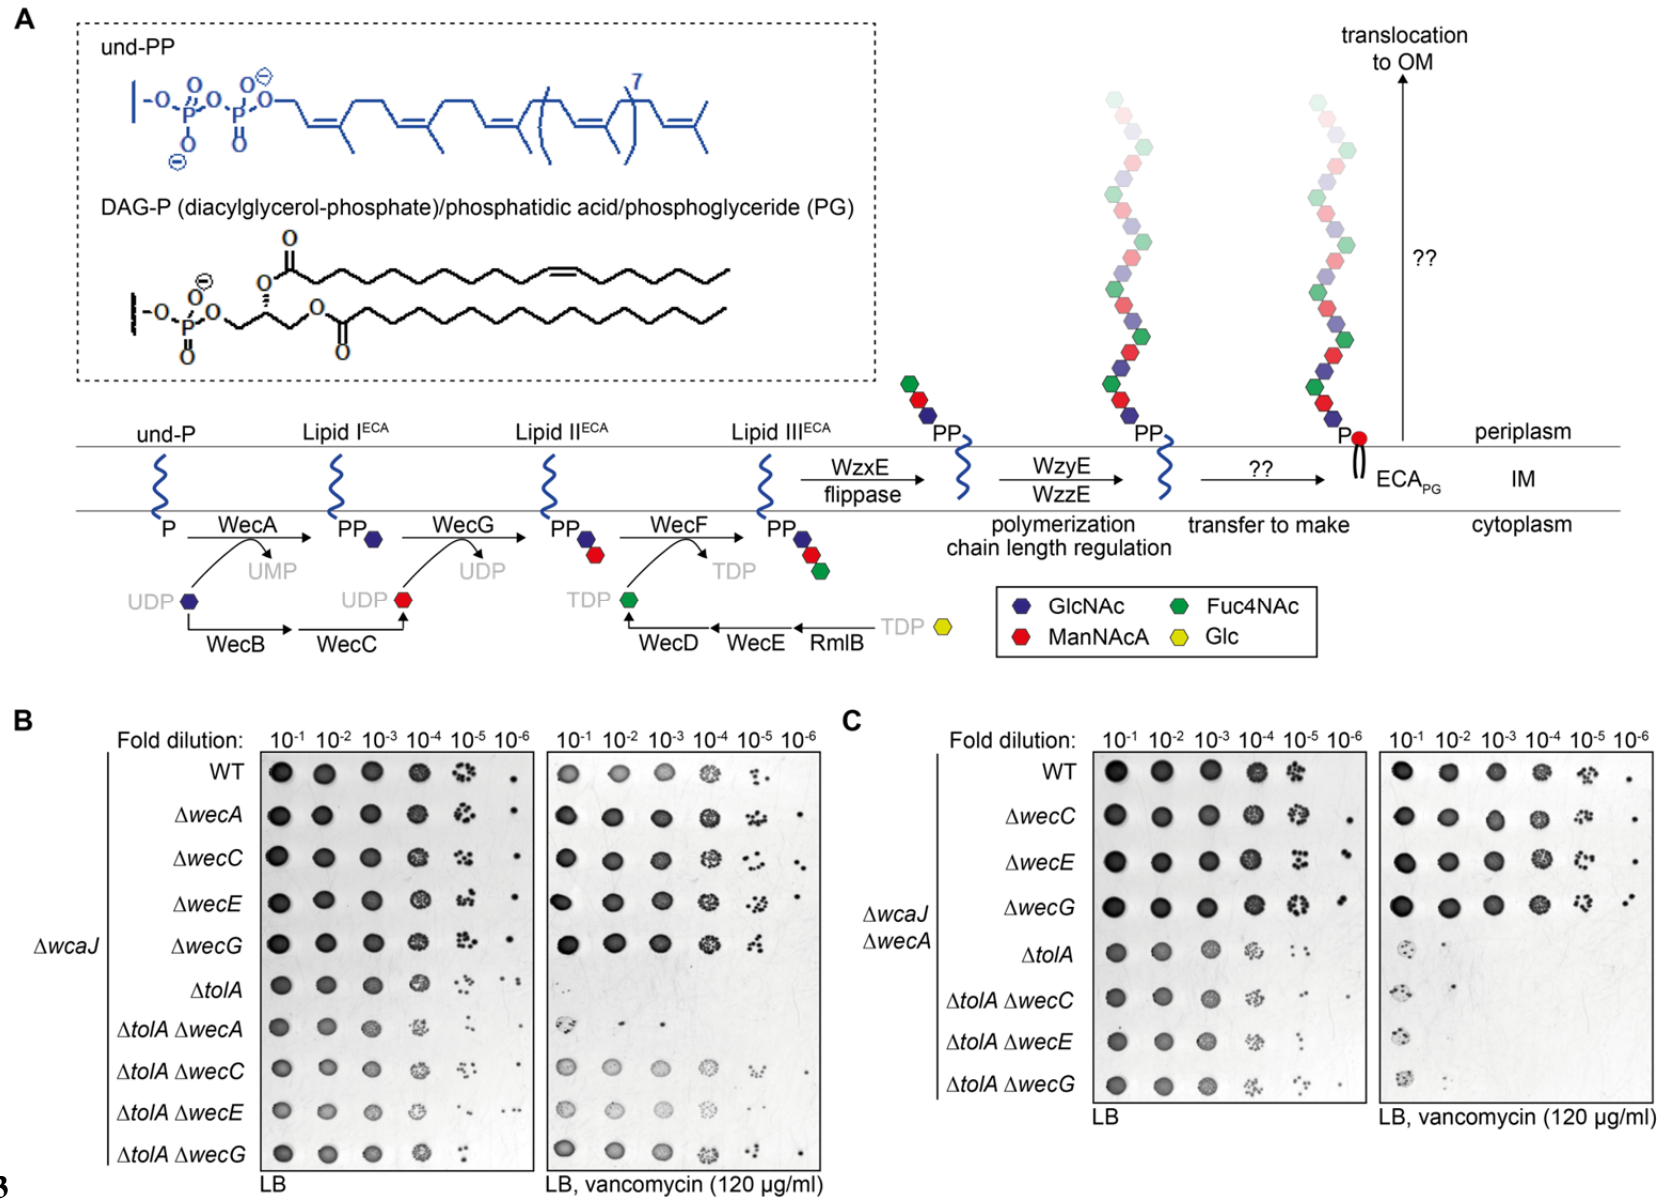

**Fig 3**





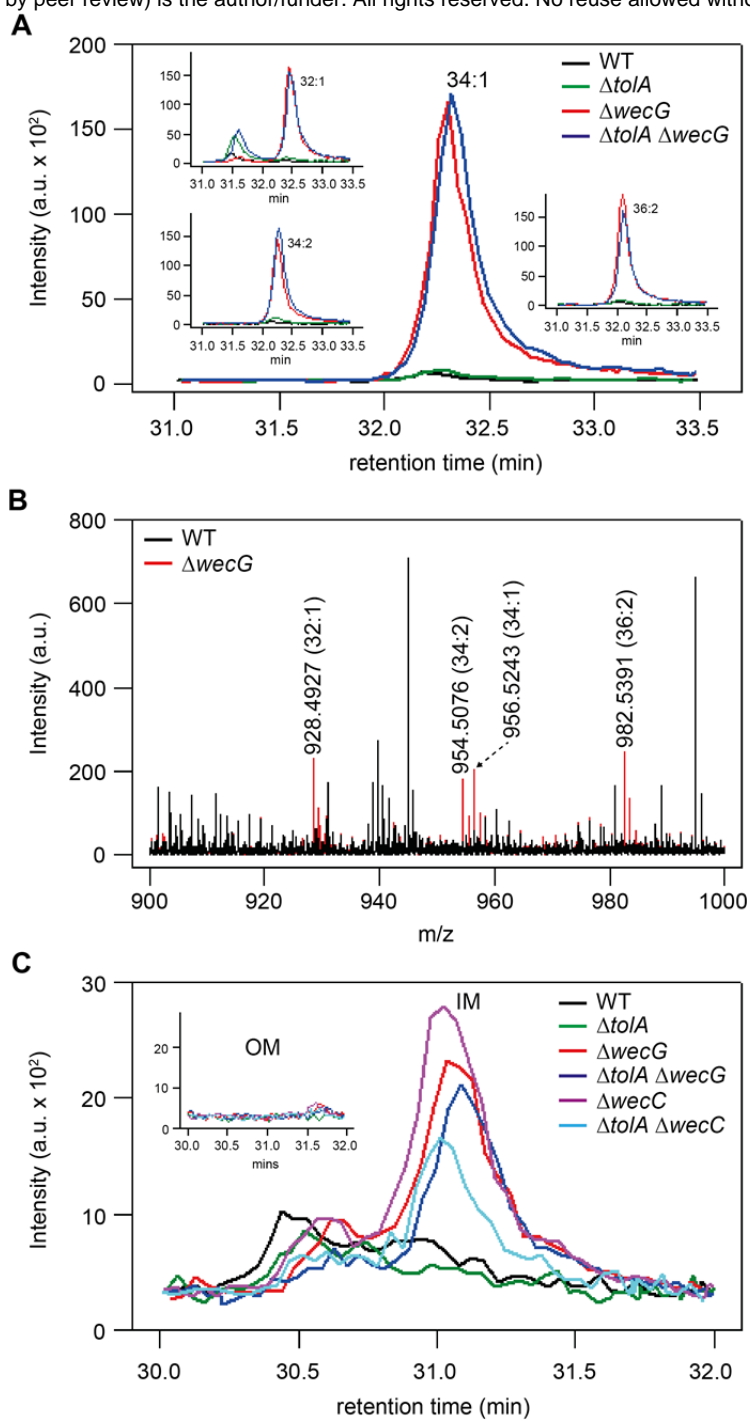

**Fig 5**

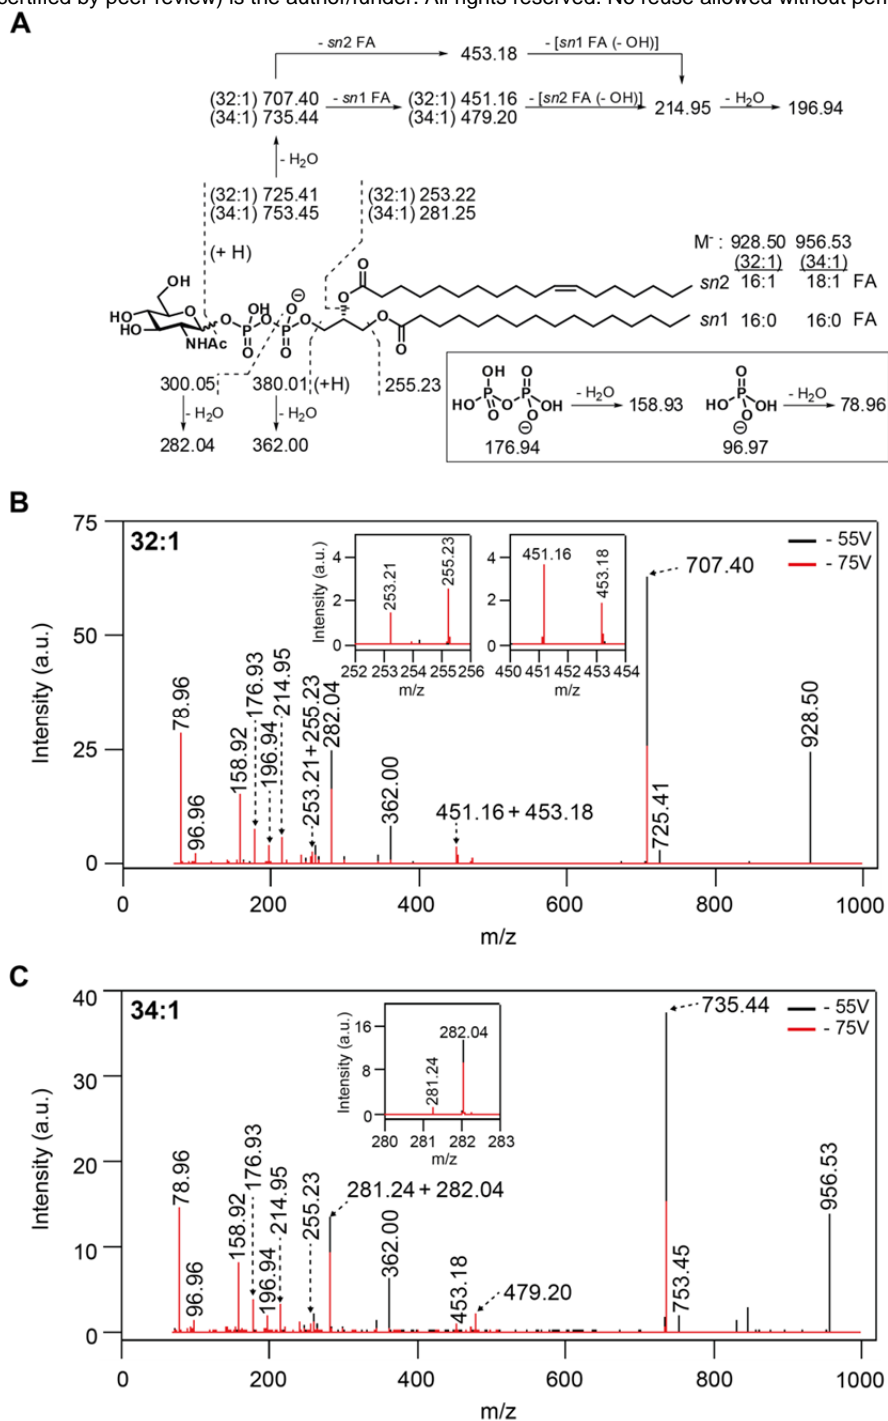

**Fig 6**

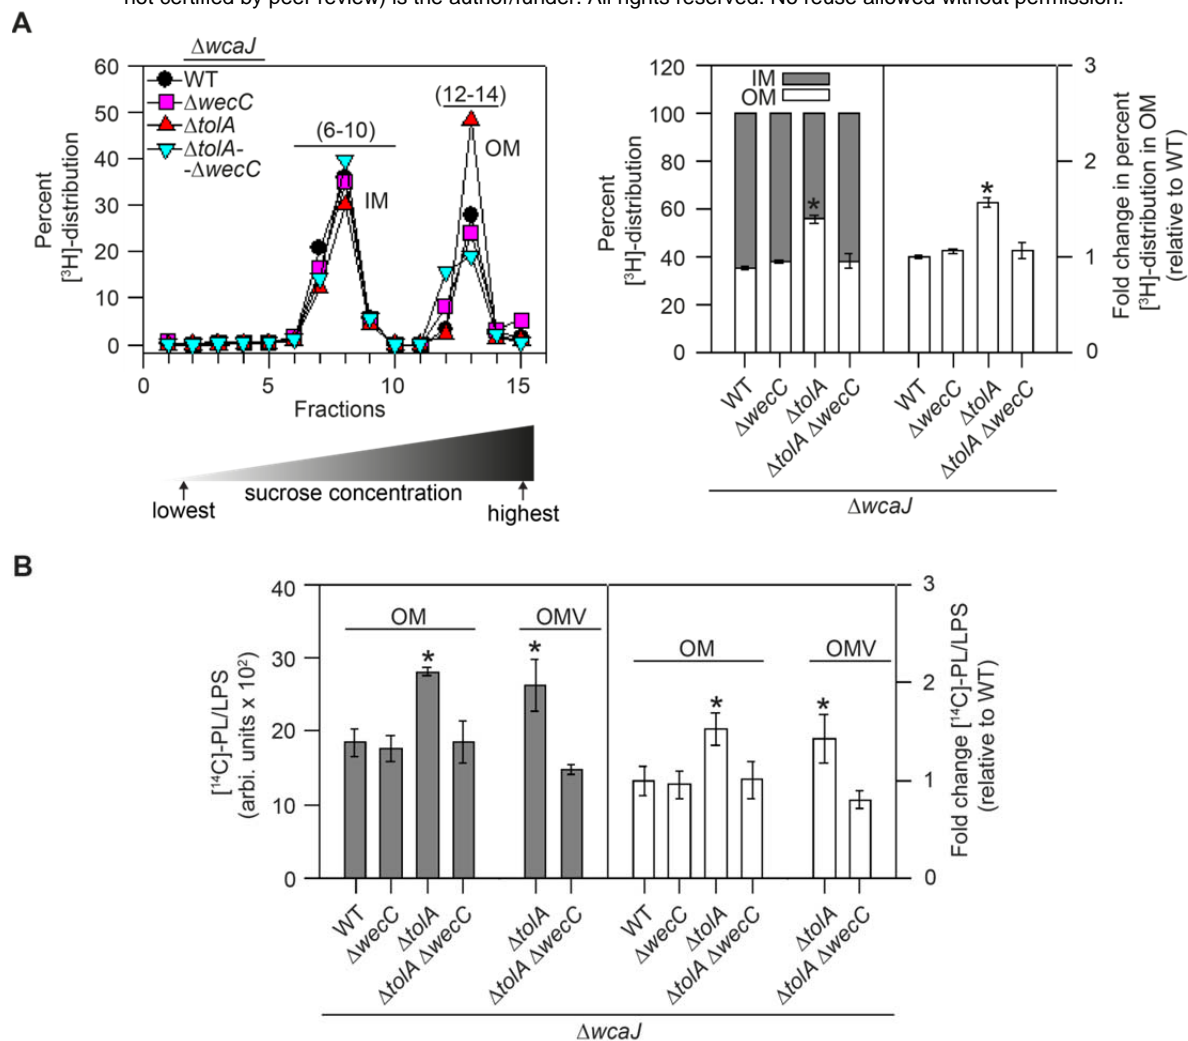

**Fig 7**
